# Supplementary material for: Deuteration of terminal alkynes realizes simultaneous live cell Raman imaging of similar alkyne-tagged biomolecules
Source: Royal Society of Chemistry journal article supplement (doi:10.1039/d1ob01479j), 2021-01-01

## Supplementary Information

### Deuteration of terminal alkynes realizes simultaneous live cell Raman imaging of similar alkyne-tagged biomolecules

Syusuke Egoshi,<sup>a</sup> Kosuke Dodo,<sup>\*ab</sup> Kenji Ohgane<sup>a</sup> and Mikiko Sodeoka<sup>\*ab</sup>

\*To whom correspondence should be addressed. Tel: +81-48-467-9373; Fax: +81-48-462-4666; e-mail: dodo@riken.jp and sodeoka@riken.jp

<sup>a</sup>Synthetic Organic Chemistry Laboratory, RIKEN Cluster for Pioneering Research, 2-1, Hirosawa, Wako, Saitama 351-0198, Japan

<sup>b</sup>RIKEN Center for Sustainable Resource Science, 2-1, Hirosawa, Wako, Saitama 351-0198, Japan

#### Contents

##### Supporting Scheme and Figures

Figure S1-S7 and Scheme S1.....S2

##### Chemistry

General.....S11

Synthesis of deuterated terminal alkynes.....S11

##### Biology

Cell culture.....S12

##### Raman experiments

Density functional theory calculation method.....S12

Raman spectra of alkynes.....S14

Molar ratio vs Raman peak-area ratio of H-alkyne and D-alkyne.....S14

Analysis of H/D exchange of alkynes.....S14

Raman imaging of HeLa cells treated with C18 fatty acids.....S14

References.....S15

NMR spectra.....S16

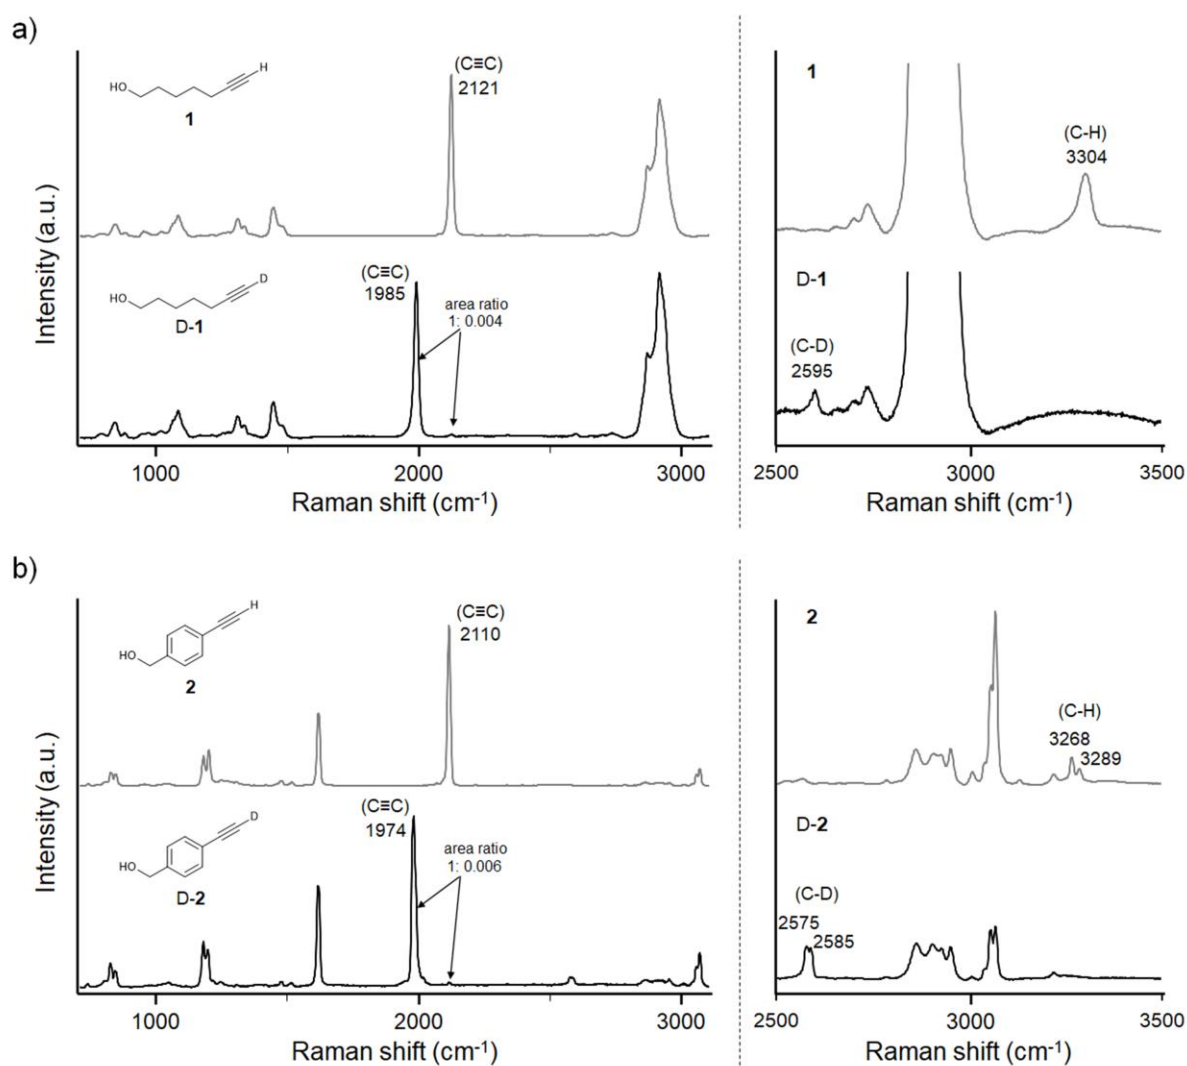

**Figure S1** Comparison of Raman spectra between H-alkynes and D-alkynes. Left: Raman spectra collected from 710 to 3100  $\text{cm}^{-1}$ . Right: Raman spectra obtained from 2500 to 3500  $\text{cm}^{-1}$ . Raman spectra are shown without background using a modified polyfit technique.<sup>1</sup> a) Raman spectra of **1** and D-**1**. The ratio of the peak areas at 1985  $\text{cm}^{-1}$  for deuterated C $\equiv$ C and 2121  $\text{cm}^{-1}$  for protonated C $\equiv$ C was 1:0.004 in Raman spectra of D-**1**. b) Raman spectra of **2** and D-**2**. The ratio of the peak areas at 1874  $\text{cm}^{-1}$  for deuterated C $\equiv$ C and 2110  $\text{cm}^{-1}$  for protonated C $\equiv$ C was 1:0.006 in Raman spectra of D-**2**.

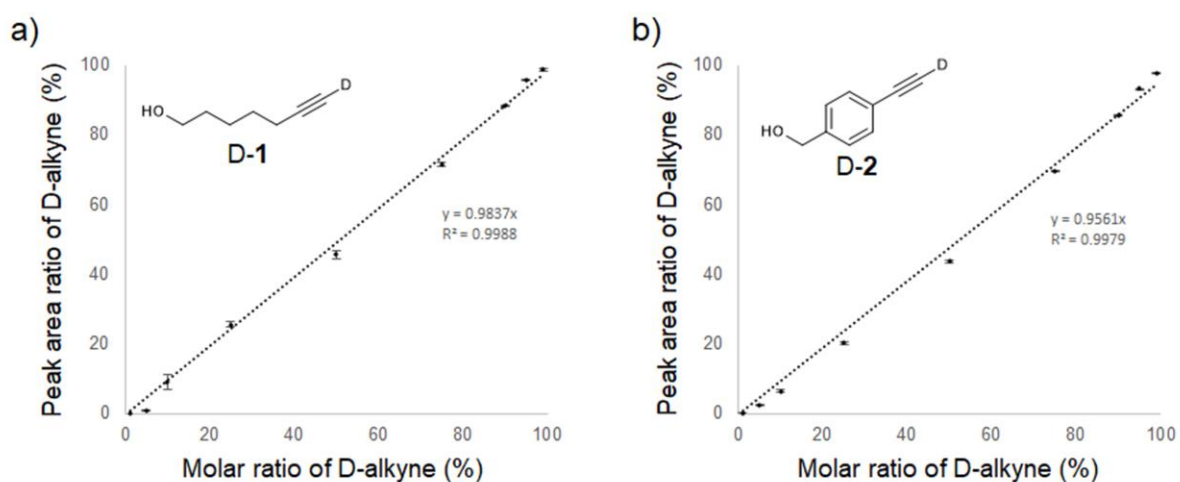

**Figure S2** Correlation curves obtained from the molar ratio vs. Raman peak area ratio of a) D-1/1 (D-1 at  $1977\text{ cm}^{-1}$  and 1 at  $2116\text{ cm}^{-1}$ ) and b) D-2/2 (D-2 at  $1970\text{ cm}^{-1}$  and 2 at  $2109\text{ cm}^{-1}$ ). The Raman peak area ratios of the D-alkynes were obtained as percentages from mixtures of various molar ratios of the H/D-alkynes (100 mM in total) in DMSO. Data are presented as mean  $\pm$  SD.

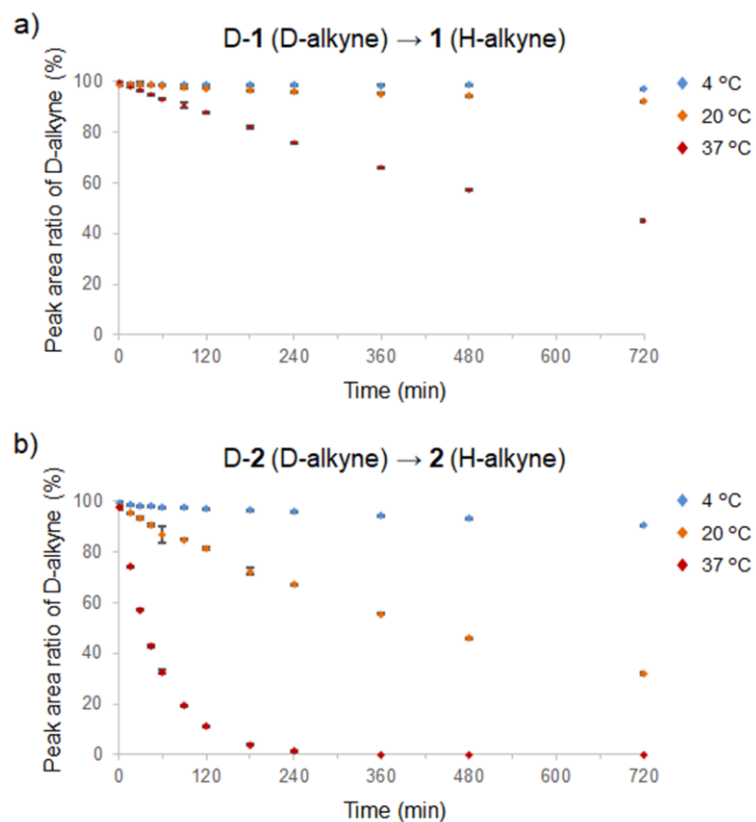

**Figure S3** Real-time analysis of D/H exchange from the D-alkynes to the H-alkynes in pH 7.0 phosphate buffer at different temperatures (4, 20, and 37 °C) for a) D-1 and b) D-2. Data are presented as mean  $\pm$  SD.

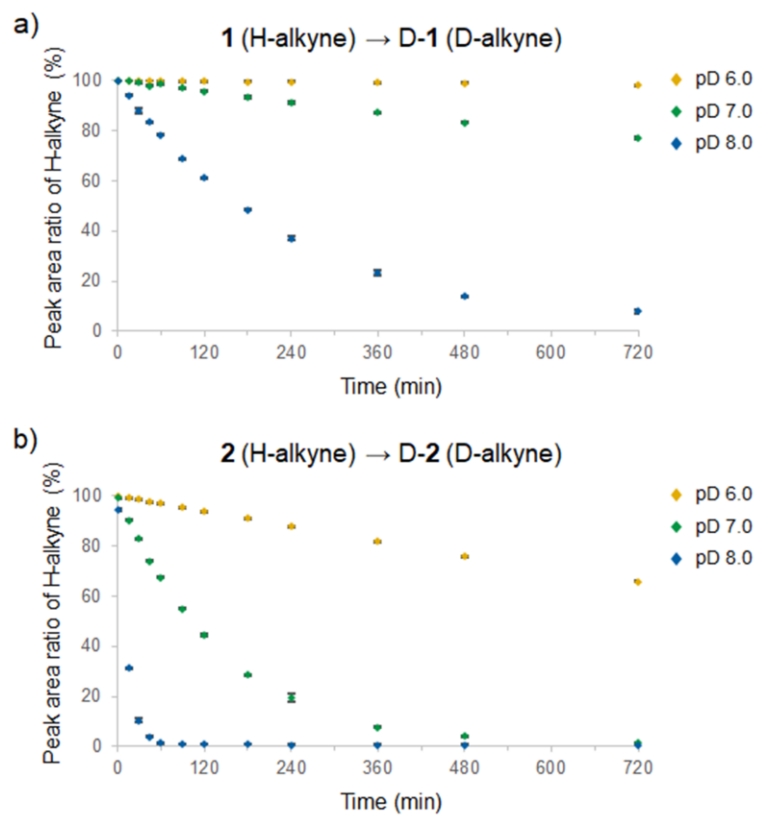

**Figure S4** Real-time analysis of H/D exchange from the H-alkynes to the D-alkynes at different pD (6.0, 7.0 and 8.0) in deuterated phosphate buffer at 37 °C for a) **1** and b) **2**. Data are presented as mean  $\pm$  SD.

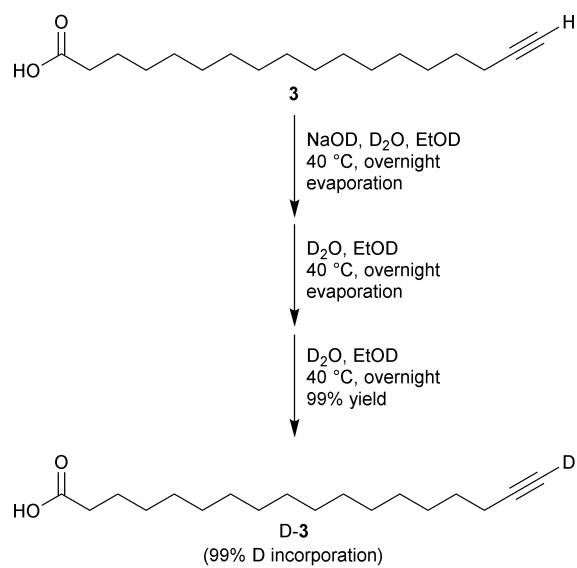

**Scheme S1** Synthesis of D-labeled octadecynoic acid (D-3).

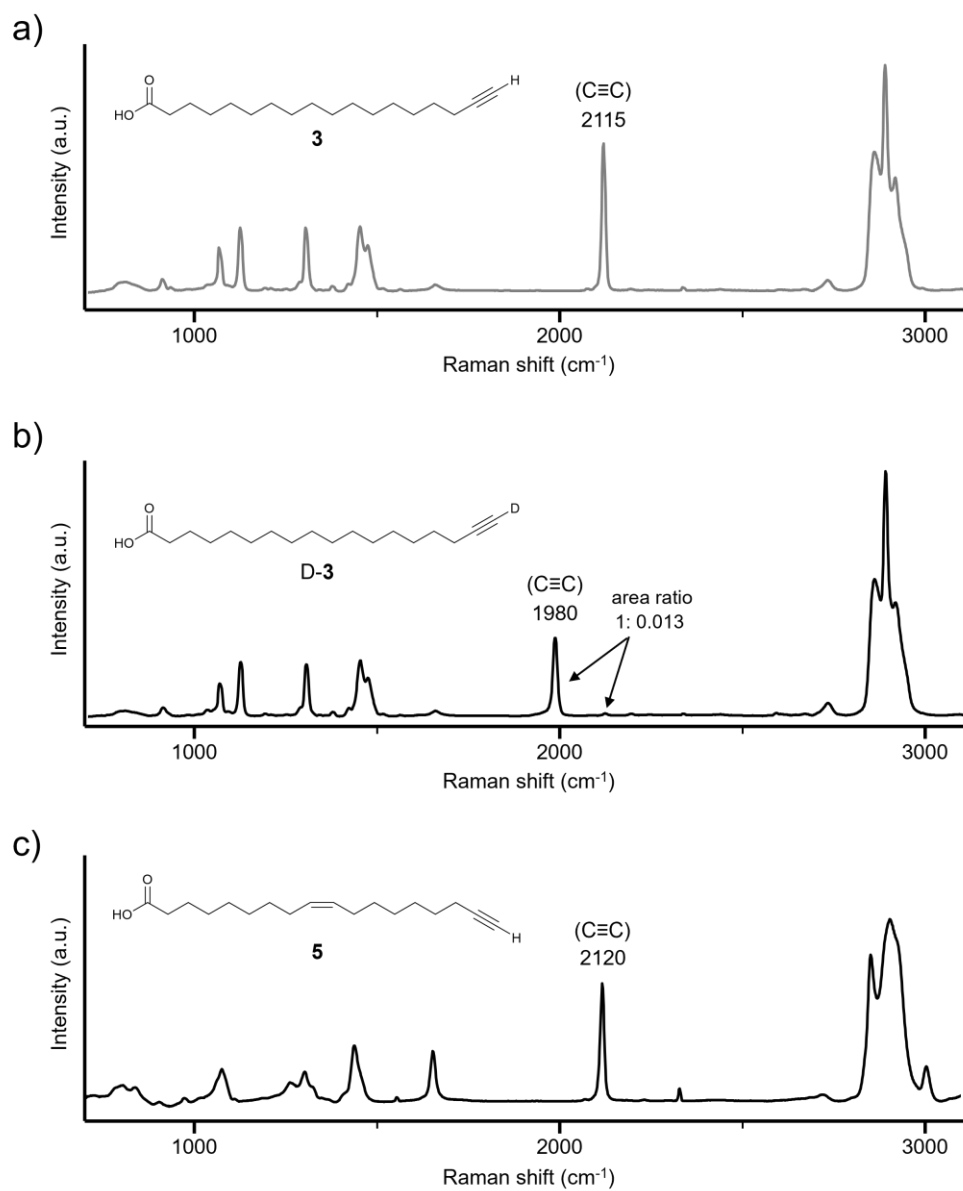

**Figure S5** Raman spectra of the alkyne-containing C18 fatty acids of a) **3**, b) **D-3** (alkyne peak area of **D-3:3** = 1:0.013), and c) **5**.

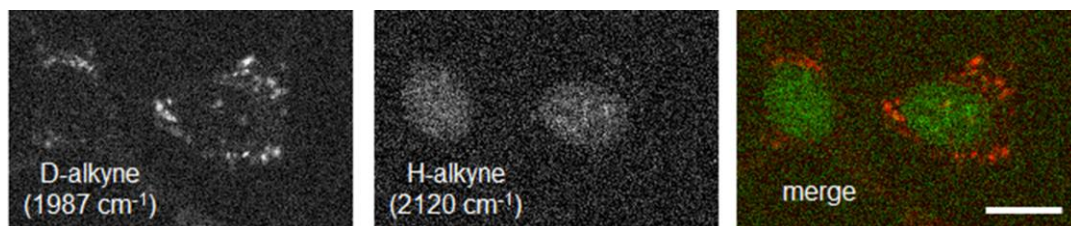

**Figure S6** Raman images of H-alkyne and D-alkyne signals in HeLa cells treated with D-**3** and EdU. HeLa cells were treated with 100  $\mu\text{M}$  D-**3** for 6 h after 22 hour cultivation with 40  $\mu\text{M}$  EdU. Images were obtained from the Raman intensity of the D-alkyne detected at 1987  $\text{cm}^{-1}$  and H-alkyne detected at 2120  $\text{cm}^{-1}$ . Two-color Raman images are the overlapped Raman images of the D-alkyne (red) and H-alkyne (green). Scale bars are 10  $\mu\text{m}$ .



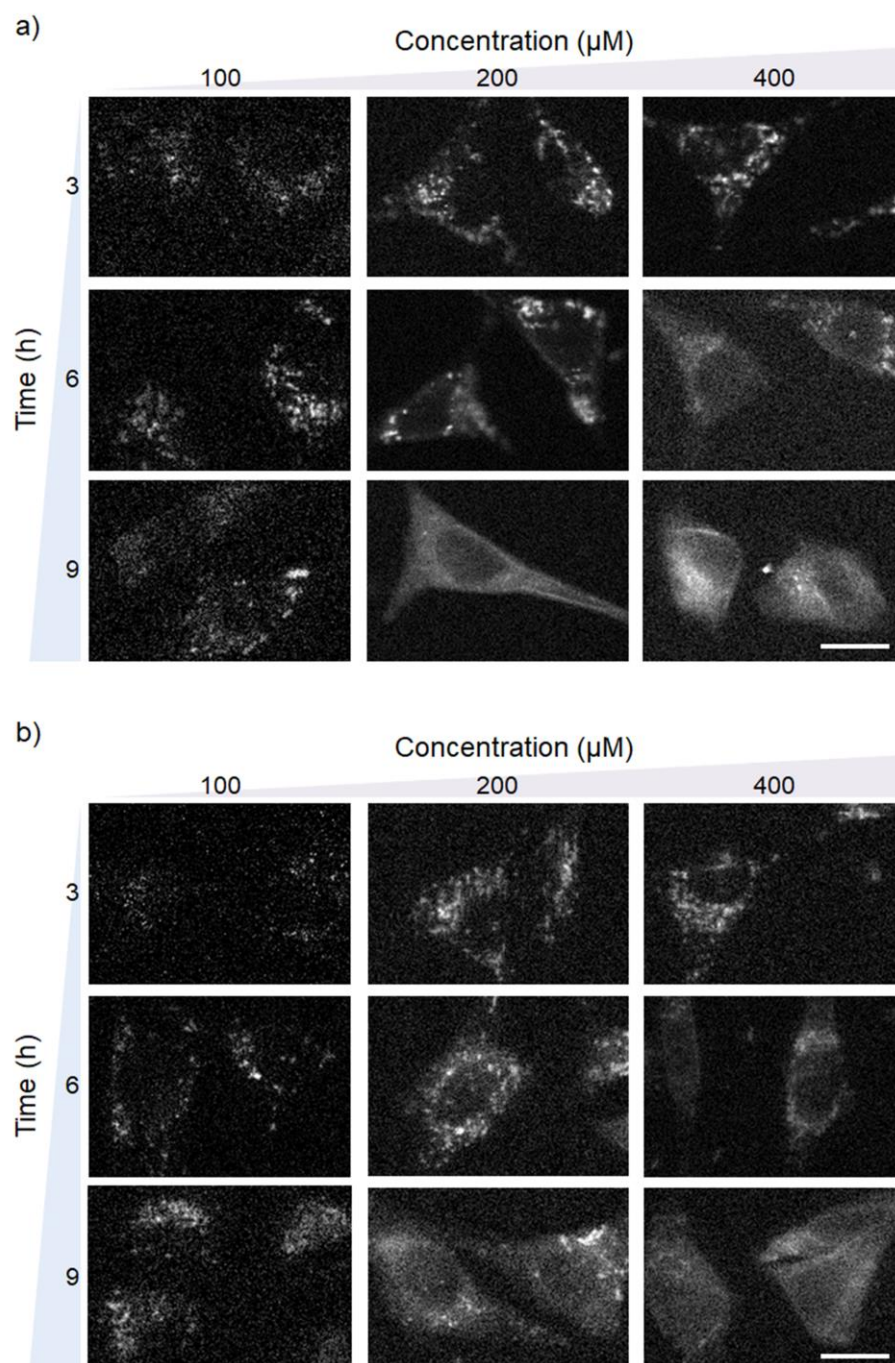

**Figure S7** Raman images of H-alkyne or D-alkyne in HeLa cells treated with **3** or D-**3** at different doses (100, 200, or 400  $\mu\text{M}$ ) and times (3, 6, or 9 h). Raman images were obtained from the Raman intensity of the a) H-alkyne of **3** detected at  $2120\text{ cm}^{-1}$  and b) D-alkyne of D-**3** detected at  $1987\text{ cm}^{-1}$ . Scale bars are  $10\ \mu\text{m}$ .

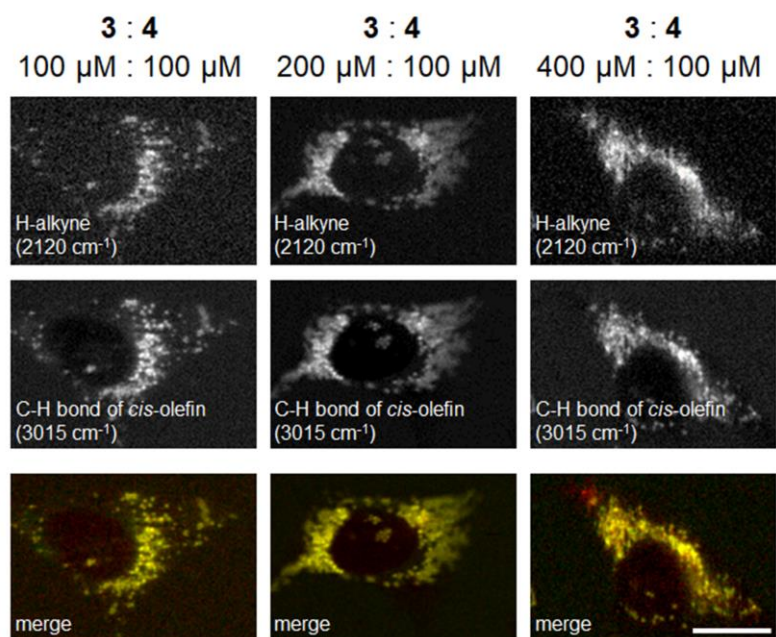

**Figure S8** Raman images of the H-alkyne and C-H bonds of *cis*-olefin in HeLa cells treated with **3** and **4** at different dose ratios (1:1, 2:1, or 4:1) for 6 h. Images were obtained from the Raman intensity of the H-alkyne detected at 2120  $\text{cm}^{-1}$  and the C-H bonds of *cis*-olefin detected at 3015  $\text{cm}^{-1}$ . Two-color Raman images are the overlapped Raman images of the H-alkyne (red) and the C-H bond of *cis*-olefin (green). Scale bars are 10  $\mu\text{m}$ .

## Chemistry

### General

$^1\text{H}$ ,  $^2\text{H}$ , and  $^{13}\text{C}$  NMR spectra were recorded using a JNM-ECS 400 spectrometer and JNM-ECA 500 spectrometer (JEOL Inc., Japan). ESI-HRMS was taken on a micrOTOF-QII-RSL (Bruker Daltonics Inc., USA). APCI-HRMS was taken on a Synapt G2 (Waters corp., USA). Column chromatography was performed using silica gel 60 (40-100  $\mu\text{m}$ ) purchased from Kanto Chemical Co., Ltd. (Japan). Chemical reagents and solvents were purchased from Tokyo Chemical Industry Co., Ltd. (Japan), FUJIFILM Wako Pure Chemical Corp. (Japan), Nacalai Tesque, Inc. (Japan), and Sigma-Aldrich Japan, Inc. (Japan). 17-octadecynoic acid (**3**) and (9Z)-9-octadecen-17-ynoic acid (**5**) were purchased from Cayman Chemical Co., Inc. (USA), and oleic acid (**4**) was purchased from Tokyo Chemical Industry Co., Ltd. (Japan).

### Synthesis of deuterated terminal alkynes

#### Deuterated 6-heptyn-1-ol (D-1)

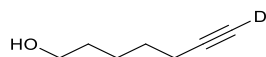

To a solution of 6-heptyn-1-ol (**1**, 184.5 mg, 1.645 mmol) in dry ethanol- $d_1$  (6.0 mL) was added  $\text{D}_2\text{O}$  (1.0 mL) and 1 N NaOD (1.0 mL, in  $\text{D}_2\text{O}$ ), and then the solution was stirred at room temperature overnight. After stirring overnight, the solvent was evaporated, and ethanol- $d_1$  (6.0 mL) and  $\text{D}_2\text{O}$  (2.0 mL) were added to the dried residue. The solution was stirred again overnight, and the same operation was repeated twice. The resulting solution was cooled to 0  $^\circ\text{C}$ , and then 1 N  $\text{KDSO}_4$  (1.2 mL, in  $\text{D}_2\text{O}$ ) was added. After the solution was concentrated, the residue was purified by column chromatography (EtOAc:hexane = 1:4 to 1:1) to yield the desired alkyne (D-1, 96.0 mg, 0.848 mmol, 52%) as a colorless oil.

$^1\text{H}$  NMR (400 MHz,  $\text{CDCl}_3$ ):  $\delta$  3.65 (t,  $J = 6.4$  Hz, 2H), 2.21 (t,  $J = 6.8$  Hz, 2H), 1.63-1.45 (m, 6H), 1.39 (s, 1H).  $^{13}\text{C}$  NMR (100 MHz,  $\text{CDCl}_3$ ):  $\delta$  84.1 (t,  $J = 7.7$  Hz, 1C), 68.2 (t,  $J = 38.1$  Hz, 1C), 62.9, 32.3, 28.3, 25.0, 18.4.  $^2\text{H}$  NMR (77 MHz,  $\text{CHCl}_3$ ): 1.94 (br s, 1H). HRMS (APCI): Calculated for  $\text{C}_7\text{H}_{11}\text{DO}^+$   $[\text{M}+\text{H}]^+$ , 114.1024; found, 114.1028.

#### Deuterated 4-ethynylbenzyl alcohol (D-2)

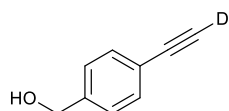

To a solution of 4-ethynylbenzyl alcohol (**2**, 131.2 mg, 0.993 mmol) in dry ethanol- $d_1$  (7.5 mL) was added  $\text{D}_2\text{O}$  (1.0 mL) and 1 N NaOD (1.5 mL, in  $\text{D}_2\text{O}$ ), and then the solution was stirred at room temperature overnight. The solvent was then evaporated, and ethanol- $d_1$  (7.5 mL) and  $\text{D}_2\text{O}$  (2.5 mL)

were added to the dried residue. The solution was stirred again overnight, and solvent was evaporated; this same procedure was repeated twice more. The final solution was cooled to 0 °C and then 1 N KDSO<sub>4</sub> (2mL, in D<sub>2</sub>O) was added. After the solution was concentrated, the residue was purified by column chromatography (EtOAc:hexane = 1:4 to 1:1) to yield the desired alkyne (D-2, 130.6 mg, 0.981 mmol, 99%) as a white solid.

<sup>1</sup>H NMR (400 MHz, methanol-d<sub>4</sub>): δ 7.43 (d, *J* = 8.4 Hz, 2H), 7.33 (d, *J* = 8.4 Hz, 2H), 4.60 (s, 2H). <sup>13</sup>C NMR (100 MHz, methanol-d<sub>4</sub>): δ 143.6, 133.0, 127.8 (2C), 122.5 (2C), 83.9 (t, *J* = 7.7 Hz, 1C), 78.1 (t, *J* = 38.6 Hz, 1C), 64.7. <sup>2</sup>H NMR (77 MHz, methanol): 3.39 (br s, 1H). HRMS (ESI): Calculated for C<sub>9</sub>H<sub>6</sub>DO<sup>-</sup> [M-H]<sup>-</sup>, 132.0565: found, 132.0566.

### Octadec-17-ynoic-18-d acid (D-3)

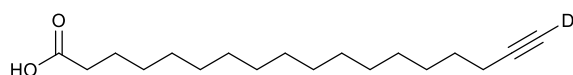

To a solution of 17-octadecynoic acid (**3**, 9.8 mg, 35.9 μmol) in dry ethanol-d<sub>1</sub> (1.0 mL) was added D<sub>2</sub>O (450 μL) and 1 N NaOD (50 μL, in D<sub>2</sub>O), and then the solution was warmed to 40 °C and stirred overnight. After stirring overnight, the solvent was evaporated, and ethanol-d<sub>1</sub> (600 μL) and D<sub>2</sub>O (300 μL) were added to the dried residue. The solution was then warmed again at 40 °C, stirred overnight, and the solvent was evaporated; this same operation was repeated twice. The resulting solution was cooled to 0 °C, and then 1 N KDSO<sub>4</sub> (100 μL, in D<sub>2</sub>O) was added. After the solution was concentrated, the residue was purified by column chromatography (EtOAc:hexane = 1:4) to yield the desired alkyne (D-3, 9.8 mg, 0.848 mmol, 99%) as a white solid.

<sup>1</sup>H NMR (400 MHz, CDCl<sub>3</sub>): δ 2.35 (t, *J* = 7.4 Hz, 2H), 2.18 (t, *J* = 7.0 Hz, 2H), 1.67-1.59 (m, 2H), 1.56-1.48 (m, 2H), 1.40-1.25 (m, 22H). <sup>13</sup>C NMR (100 MHz, CDCl<sub>3</sub>): δ 179.9, 84.5 (t, *J* = 7.3 Hz, 1C), 67.9 (t, *J* = 37.6 Hz, 1C), 34.1, 29.8 (3C), 29.8 (2C), 29.8, 29.7, 29.6, 29.4, 29.3, 29.2, 28.9, 28.7, 24.8. <sup>2</sup>H NMR (77 MHz, CHCl<sub>3</sub>): 1.93 (br s, 1H). HRMS (ESI): Calculated for C<sub>18</sub>H<sub>30</sub>DO<sub>2</sub><sup>-</sup> [M-H]<sup>-</sup>, 280.2392: found, 280.2390.

## Biology

### Cell culture

HeLa cells were maintained in Dulbecco's modified Eagle's medium supplemented with 100 U/mL penicillin, 100 μg/mL streptomycin, and 10% heat-inactivated fetal bovine serum (FBS). The cells were grown in a humidified incubator at 37 °C under 5% CO<sub>2</sub>/95% air.

## Raman experiments

### Density functional theory calculation method

DFT calculations were done by using “Gaussian 16” software.<sup>2</sup> The calculations (geometry optimizations and frequency calculations) of 1-hexyne/D-1-hexyne were done in water by using the B3LYP functional and the 6-31G\* basis set. Final geometries of structure follow.

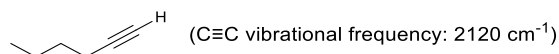

|     |            |            |            |
|-----|------------|------------|------------|
| C1  | -2.8811452 | -0.497967  | 0.0000102  |
| C2  | -1.6923752 | 0.4684373  | -0.0001685 |
| C3  | -0.3391783 | -0.2517399 | 0.0001258  |
| C4  | 0.8507237  | 0.731886   | 0.000085   |
| C5  | 2.1538408  | 0.0625163  | 0.0000746  |
| C6  | 3.2204756  | -0.5076774 | -0.0001149 |
| H7  | -3.8336728 | 0.0439821  | -0.00022   |
| H8  | -2.8647596 | -1.1456779 | -0.8851171 |
| H9  | -2.864903  | -1.145175  | 0.8855074  |
| H10 | -1.7529609 | 1.1256167  | 0.8786768  |
| H11 | -1.752832  | 1.1251327  | -0.8793828 |
| H12 | -0.2647647 | -0.9040426 | -0.8797705 |
| H13 | -0.2649664 | -0.9036813 | 0.8803099  |
| H14 | 0.7804759  | 1.3891677  | 0.8778825  |
| H15 | 0.7804158  | 1.3891707  | -0.8777081 |
| H16 | 4.163919   | -1.0072244 | -0.0002513 |

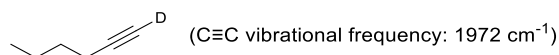

|     |            |            |            |
|-----|------------|------------|------------|
| C1  | -2.8811435 | -0.4979682 | 0.0000099  |
| C2  | -1.6923748 | 0.4684372  | -0.0001666 |
| C3  | -0.3391778 | -0.2517395 | 0.0001247  |
| C4  | 0.8507232  | 0.7318875  | 0.0000843  |
| C5  | 2.1538404  | 0.0625183  | 0.0000728  |
| C6  | 3.2204734  | -0.5076795 | -0.0001132 |
| H7  | -3.8336705 | 0.0439811  | -0.0002171 |
| H8  | -2.8647589 | -1.1456759 | -0.8851196 |
| H9  | -2.8649002 | -1.1451793 | 0.8855048  |
| H10 | -1.7529606 | 1.1256142  | 0.8786804  |
| H11 | -1.7528328 | 1.1251351  | -0.8793791 |
| H12 | -0.2647644 | -0.9040403 | -0.879773  |
| H13 | -0.2649642 | -0.9036826 | 0.8803074  |
| H14 | 0.780475   | 1.389169   | 0.8778818  |
| H15 | 0.7804154  | 1.3891719  | -0.8777088 |
| D16 | 4.1639156  | -1.0072291 | -0.0002491 |

### **Raman spectra of alkynes (Figure S1 and S5)**

Raman spectra were obtained using a RAMAN-11 slit-scanning Raman microscope (Nanophoton Corp., Japan) at 532 nm excitation. The alkynes were placed on a quartz substrate during the measurements. The laser output was focused on each sample by a 60×/1.27 numerical aperture (NA) water immersion objective lens (CFI Plan Apo IR 60X WI, NIKON Corp., Japan). The slit width of the spectrograph was 50 μm. The exposure time for each line was 10 s. The light intensity at the sample plane was 1.5 mW/μm<sup>2</sup>. Raman spectra of alkynes were obtained from an average intensity of 900 (X × Y = 30 × 30 or 60 × 15) pixels.

### **Molar ratio vs. Raman peak area ratio of H-alkyne and D-alkyne (Figure S2)**

Solutions containing several proportions of H-alkyne and D-alkyne were obtained by blending 100 mM H-alkynes in DMSO and 100 mM D-alkynes in DMSO. Raman spectra of the solutions were measured using a 532 nm line laser. The exposure time for each line was 10 s, and the light intensity at the sample plane was 3.0 mW/μm<sup>2</sup>. The obtained spectra were subtracted from the background of DMSO. The peak areas of the D-alkyne and H-alkyne were computed using “Raman Viewer” software equipped on the Raman microscope. Finally, a correlation curve was calculated from the Raman peak area ratio between H-alkyne and D-alkyne, and the molar ratio of H-alkyne and D-alkyne in the solutions.

### **Analysis of the H/D exchange rate (Figure 2, S3 and S4)**

A 1 M DMSO stock solution of alkynes was dissolved in 25 mM phosphate buffer (pH 6.0, 7.0, or 8.0) or 25mM deuterated phosphate buffer (pD 6.0, 7.0, or 8.0). The sample solutions (20 mM) were maintained at 4-37 °C in a block incubator (BI-516S, Astec Co., Ltd., Japan). Raman spectra of the sample solutions were measured using a 532 nm line laser. The exposure time for each line was 10 s, and the light intensity at the sample plane was 3.0 mW/μm<sup>2</sup>. The obtained spectra were subtracted from the background of the buffers containing 2% DMSO. The peak areas of D-alkyne and H-alkyne were computed using “Raman Viewer” software equipped on the Raman microscope. Finally, the conversion ratio was calculated from the Raman peak area ratio between the D-alkyne and H-alkyne at different reaction times.

### **Raman imaging experiments of HeLa cells treated with C18 fatty acids (Figure 4, 5, S7 and S8)**

HeLa cells (2.4 mL, 5.0 × 10<sup>4</sup> cells/mL) were placed on a sterilized Φ25 mm quartz substrate in a TPP tissue culture dish (No. 93040; TPP Techno Plastic Products AG, Switzerland). After overnight incubation, the fatty acid stock solutions (50 mM in EtOH) were added and incubated for different durations (3, 6, 9, 12, or 24 h). The medium was replaced with Tyrode’s buffer (150 mM NaCl, 10 mM glucose, 10 mM HEPES, 4 mM KCl, 1 mM MgCl<sub>2</sub>, 1 mM CaCl<sub>2</sub>, and 4 mM NaOH) after washing with

phosphate buffered saline (PBS) (-). A quartz substrate was used to observe the Raman spectra with a RAMAN-11 slit-scanning Raman microscope at 532 nm excitation. The laser output was focused onto the sample using a 60×/1/.27 NA water immersion objective lens. The slit width of the spectrograph was 50  $\mu\text{m}$ . The exposure time for each line was 10 s. The light intensity at the sample plane was calculated as 3.0 mW/ $\mu\text{m}^2$ .

To obtain the Raman images, the Raman spectral data set was further processed using the singular value decomposition (SVD) technique for noise reduction.<sup>3</sup> We selected several spectral regions (705-3105  $\text{cm}^{-1}$  for the C-H bond of *cis*-olefin, 1900-2050  $\text{cm}^{-1}$  for the C $\equiv$ C bond of D-alkyne, and 2050-2200  $\text{cm}^{-1}$  for the C $\equiv$ C bond of H-alkyne) in the calculation procedure for SVD to avoid artifacts in the constructed images. A modified polyfit technique was then used at each pixel to determine the autofluorescence baseline signal, which was subtracted from the original Raman spectrum.<sup>1</sup> Finally, the Raman images were reconstructed using each vibrational band of interest. All data processing was performed using “Raman Viewer” image processing software (Nanophoton Corp., Japan).

## References

- 1 A. Mahadevan-Jansen and C. A. Lieber, *Appl. Spectrosc.*, 2003, **57**, 1363–1367.
- 2 Gaussian 16, Revision C.01, M. J. Frisch, G. W. Trucks, H. B. Schlegel, G. E. Scuseria, M. A. Robb, J. R. Cheeseman, G. Scalmani, V. Barone, G. A. Petersson, H. Nakatsuji, X. Li, M. Caricato, A. V. Marenich, J. Bloino, B. G. Janesko, R. Gomperts, B. Mennucci, H. P. Hratchian, J. V. Ortiz, A. F. Izmaylov, J. L. Sonnenberg, D. Williams-Young, F. Ding, F. Lipparini, F. Egidi, J. Goings, B. Peng, A. Petrone, T. Henderson, D. Ranasinghe, V. G. Zakrzewski, J. Gao, N. Rega, G. Zheng, W. Liang, M. Hada, M. Ehara, K. Toyota, R. Fukuda, J. Hasegawa, M. Ishida, T. Nakajima, Y. Honda, O. Kitao, H. Nakai, T. Vreven, K. Throssell, J. A. Montgomery, Jr., J. E. Peralta, F. Ogliaro, M. J. Bearpark, J. J. Heyd, E. N. Brothers, K. N. Kudin, V. N. Staroverov, T. A. Keith, R. Kobayashi, J. Normand, K. Raghavachari, A. P. Rendell, J. C. Burant, S. S. Iyengar, J. Tomasi, M. Cossi, J. M. Millam, M. Klene, C. Adamo, R. Cammi, J. W. Ochterski, R. L. Martin, K. Morokuma, O. Farkas, J. B. Foresman, and D. J. Fox, Gaussian, Inc., Wallingford CT, 2016.
- 3 H. J. Van Manen, Y. M. Kraan, D. Roos and C. Otto, *J. Phys. Chem. B*, 2004, **108**, 18762–18771.

# NMR spectra of deuterated terminal alkynes:

## <sup>1</sup>H NMR of D-1

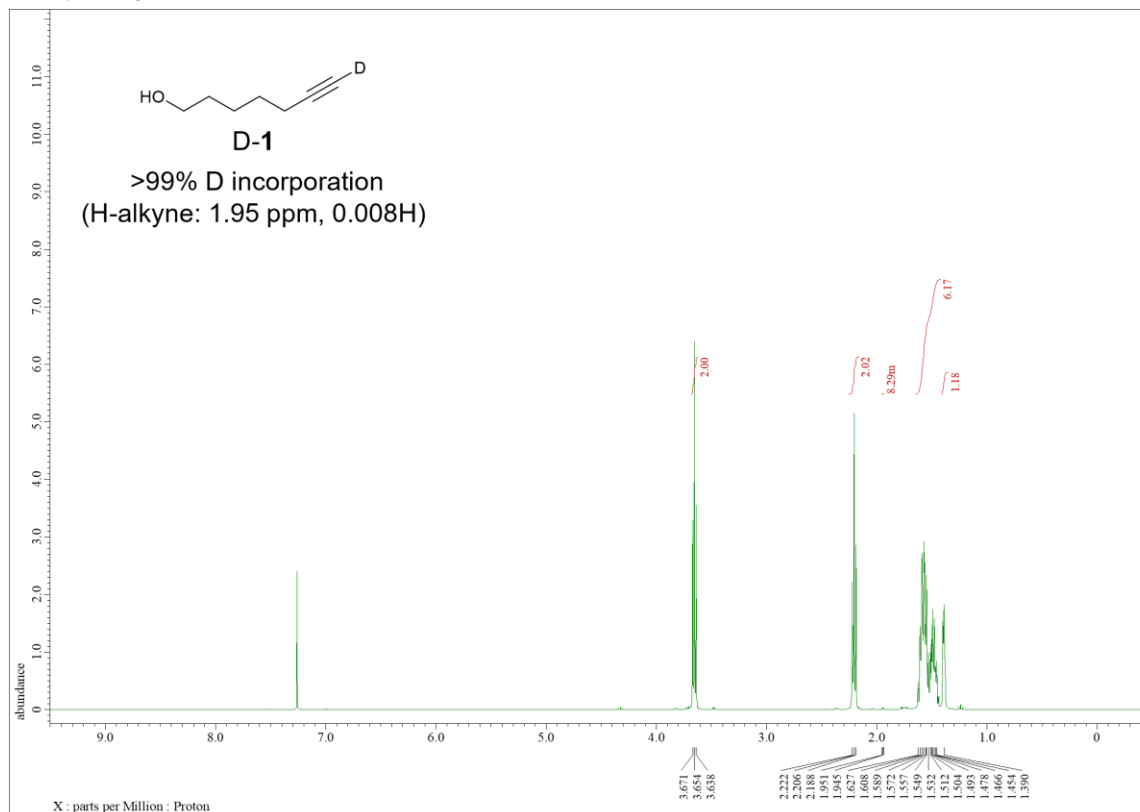

## <sup>13</sup>C NMR of D-1

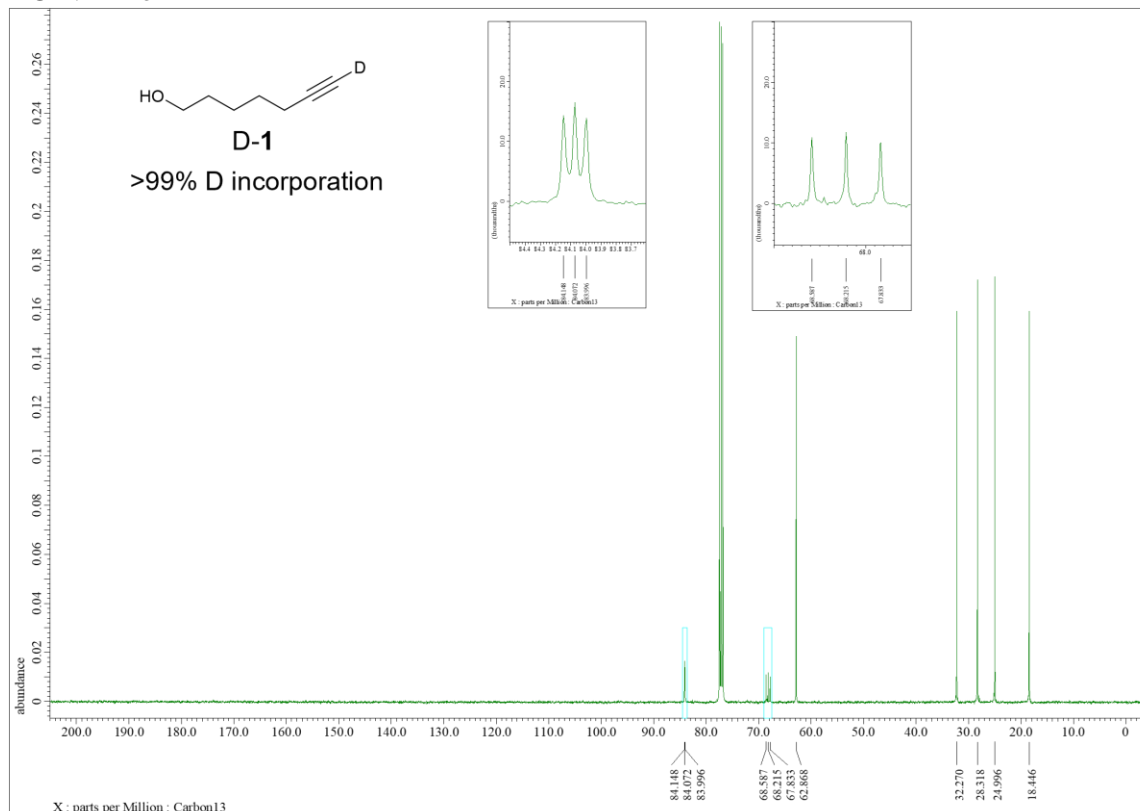



## $^2\text{H}$ NMR of D-1

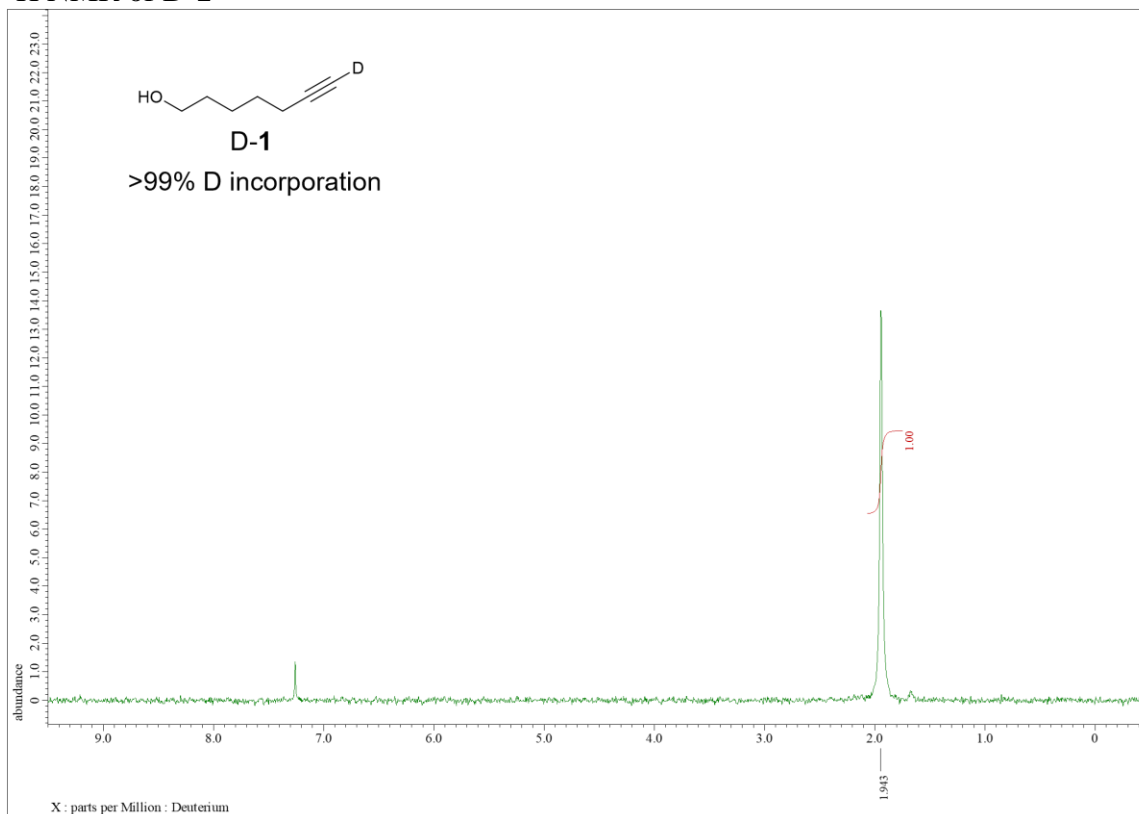

## $^1\text{H}$ NMR of D-2

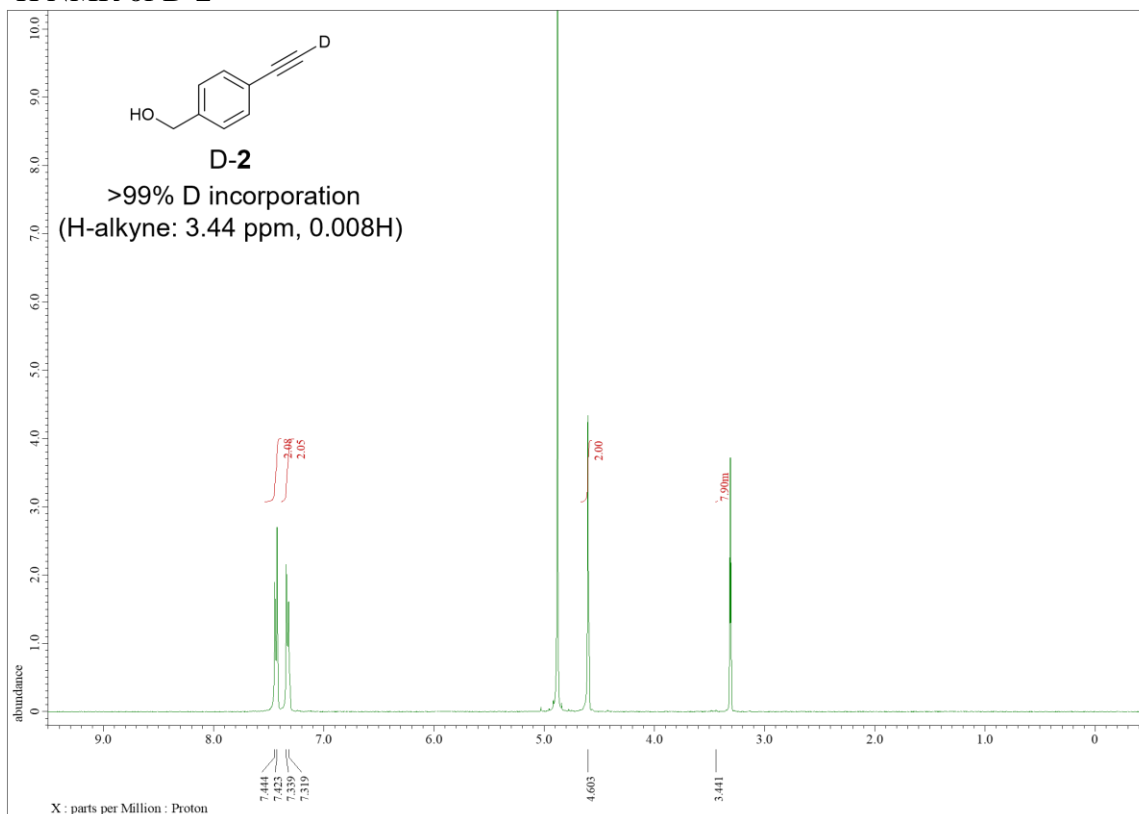

### $^{13}\text{C}$ NMR of D-2

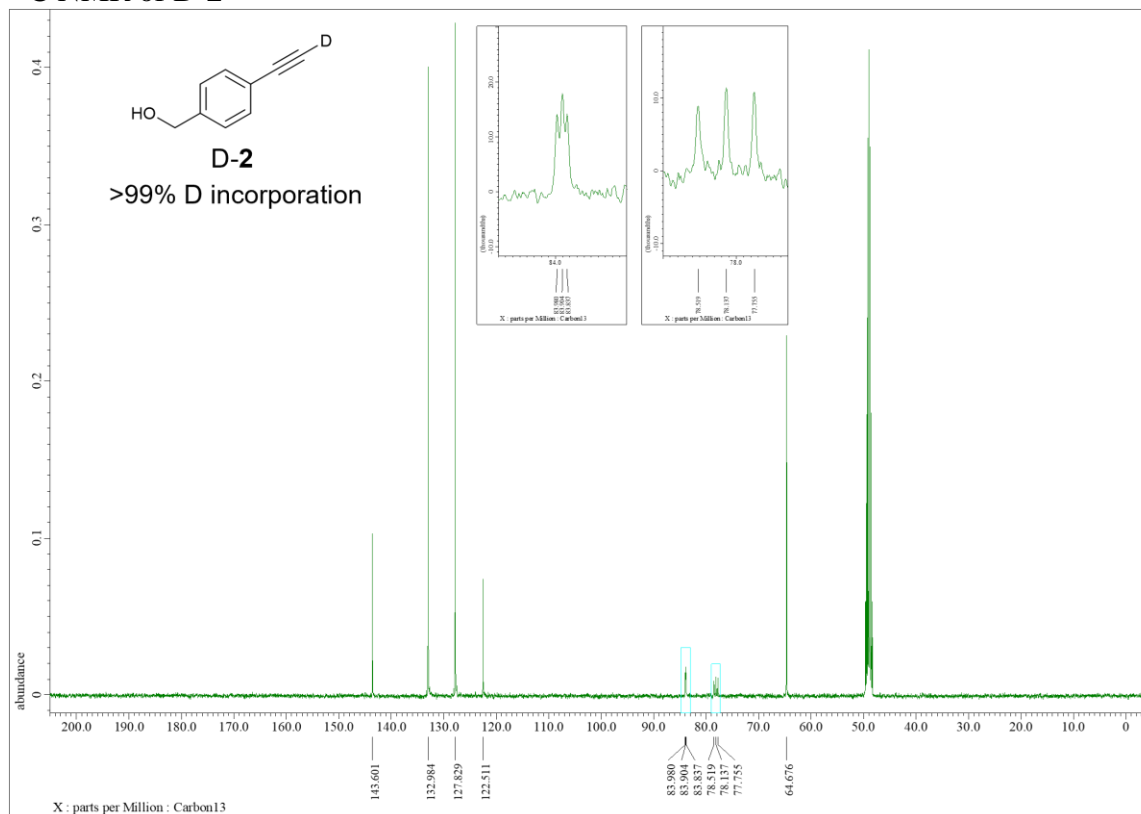

### $^2\text{H}$ NMR of D-2

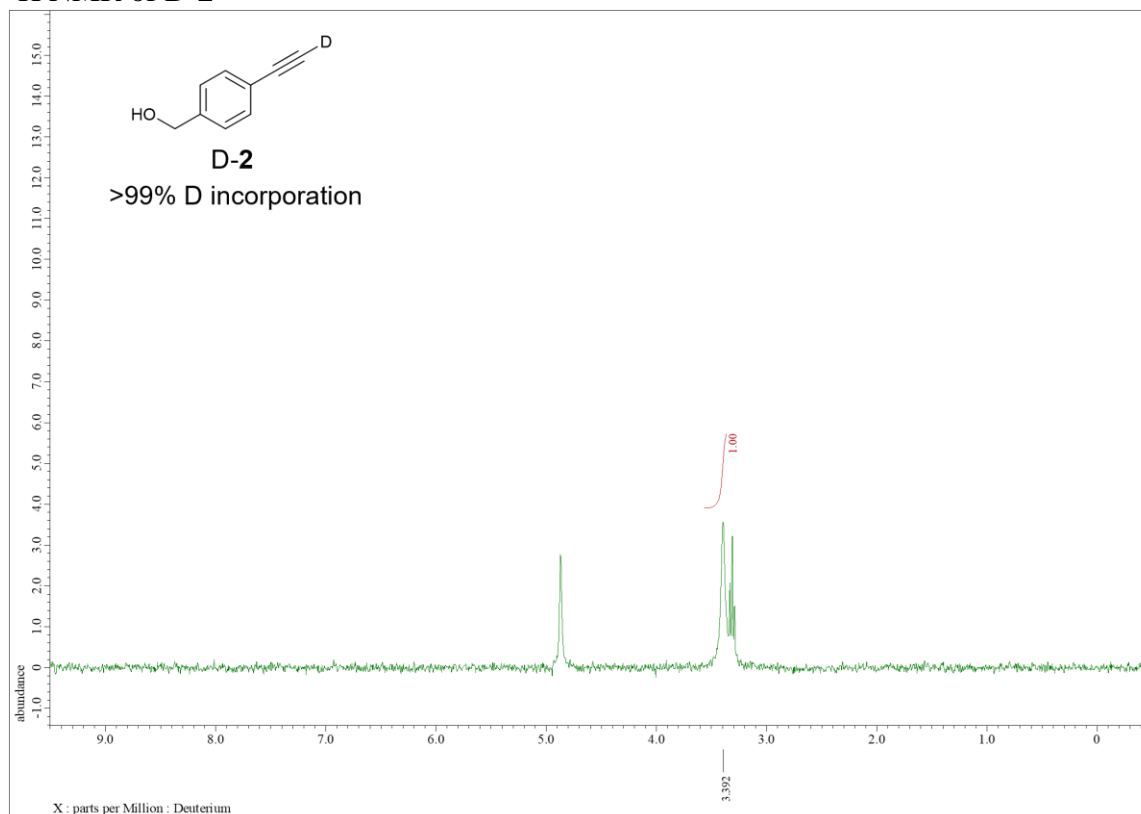

# <sup>1</sup>H NMR of D-3

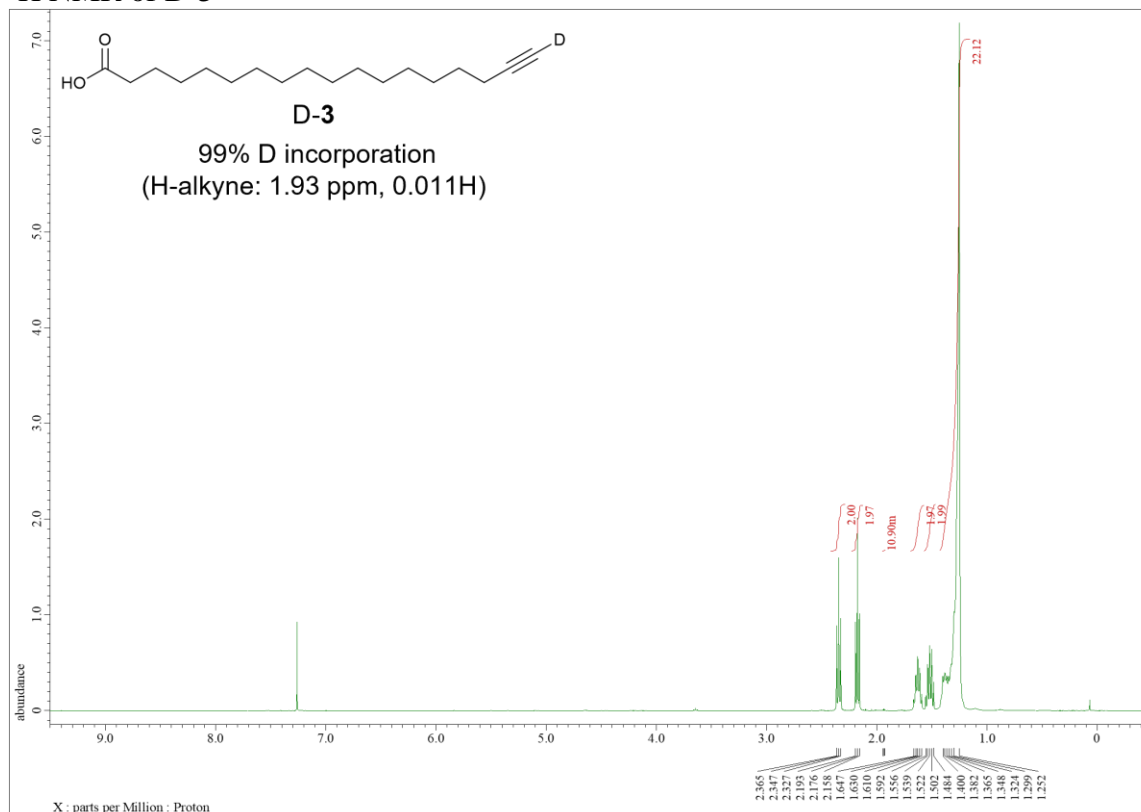

# <sup>13</sup>C NMR of D-3

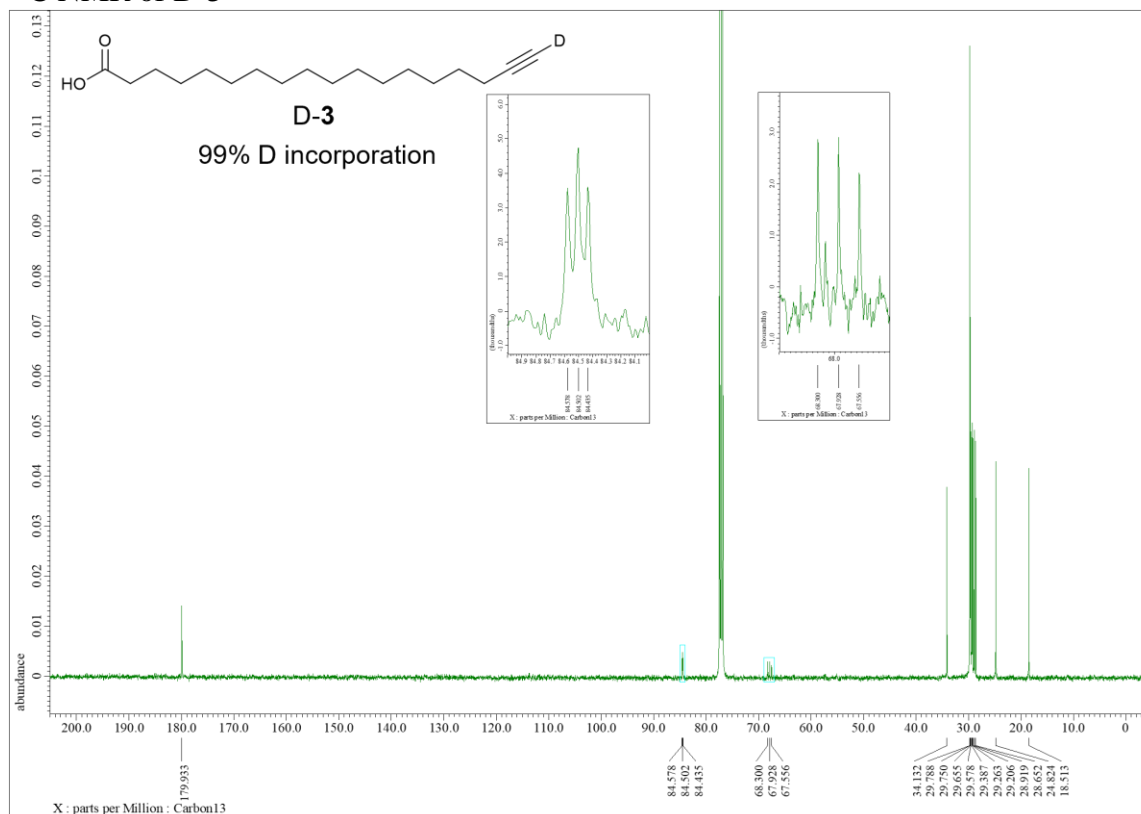

## $^2\text{H}$ NMR of D-3

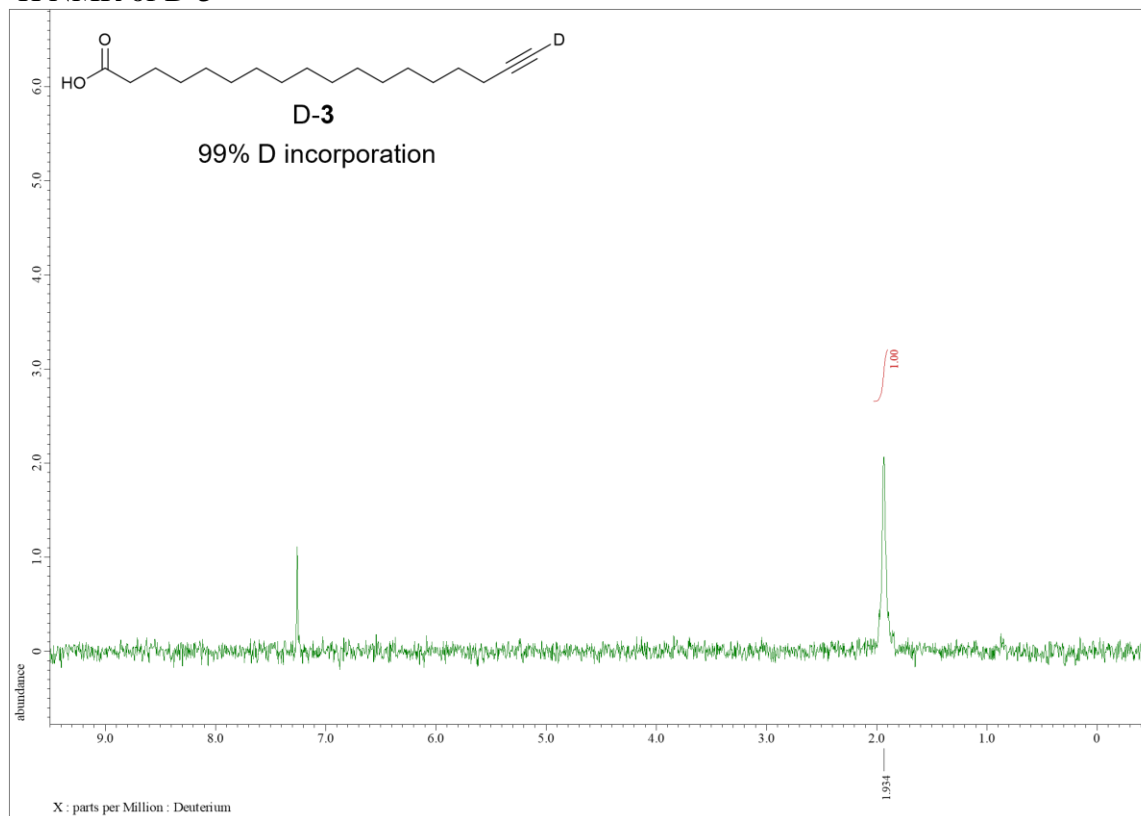

Supplement: d1ob01479j1.pdf [file d1ob01479j1.pdf]
